# Supplementary material for: Zygote morphogenesis but not the establishment of cell polarity in Plasmodium berghei is controlled by the small GTPase, RAB11A
Source: PLoS Pathog. 2020 May 28;16(5):e1008091. doi: 10.1371/journal.ppat.1008091 (PMC7255598; doi:10.1371/journal.ppat.1008091)
Supplement: S7 Table — (XLSX) [file ppat.1008091.s021.xlsx]

## Sheet: Sheet1
Set1
WT-GFPCON gametocytes1.merge.bam			pclag::rab11a gametocytes1.merge.bam
Stats for BAM file(s):			Stats for BAM file(s):
Total reads: 8609950			Total reads: 3264448
Mapped reads: 8609950	-1		Mapped reads: 3264448	-1
Forward strand: 4133611	-0.4801		Forward strand: 2315093	-0.7092
Reverse strand: 4476339	-0.5199		Reverse strand: 949355	-0.2908
Failed QC: 0	0		Failed QC: 0	0
Duplicates: 0	0		Duplicates: 0	0
Paired-end reads: 0	0		Paired-end reads: 0	0
WT-GFPCON ookinetes1.merge.bam
Stats for BAM file(s):
Total reads: 5290409
Mapped reads: 5290409	-1
Forward strand: 2897080	-0.5476
Reverse strand: 2393329	-0.4524
Failed QC: 0	0
Duplicates: 0	0
Paired-end reads: 0	0
pclag::rab11a ookinetes1.merge.bam
Stats for BAM file(s):
Total reads: 6317982
Mapped reads: 6317982	-1
Forward strand: 3486291	-0.5518
Reverse strand: 2831691	-0.4482
Failed QC: 0	0
Duplicates: 0	0
Paired-end reads: 0	0
Set2
WT-GFPCON gametocytes2.merge.bam			pclag::rab11a gametocytes2.merge.bam
Stats for BAM file(s):			Stats for BAM file(s):
Total reads: 8943276			Total reads: 5569828
Mapped reads: 8943276	-1		Mapped reads: 5569828	-1
Forward strand: 4095083	-0.4579		Forward strand: 2492556	-0.4475
Reverse strand: 4848193	-0.5421		Reverse strand: 3077272	-0.5525
Failed QC: 0	0		Failed QC: 0	0
Duplicates: 0	0		Duplicates: 0	0
Paired-end reads: 0	0		Paired-end reads: 0	0
WT-GFPCON ookinetes2.merge.bam
Stats for BAM file(s):
Total reads: 3555698
Mapped reads: 3555698	-1
Forward strand: 1958254	-0.5507
Reverse strand: 1597444	-0.4493
Failed QC: 0	0
Duplicates: 0	0
Paired-end reads: 0	0
pclag::rab11a ookinetes2.merge.bam
Stats for BAM file(s):
Total reads: 7054508
Mapped reads: 7054508	-1
Forward strand: 3728459	-0.5285
Reverse strand: 3326049	-0.4715
Failed QC: 0	0
Duplicates: 0	0
Paired-end reads: 0	0
Set3
WT-GFPCON gametocyte3.merge.bam			pclag::rab11a gametocytes3.merge.bam
Stats for BAM file(s):			Stats for BAM file(s):
Total reads: 7128574			Total reads: 6836368
Mapped reads: 7128574	-1		Mapped reads: 6836368	-1
Forward strand: 3587661	-0.5033		Forward strand: 3348360	-0.4898
Reverse strand: 3540913	-0.4967		Reverse strand: 3488008	-0.5102
Failed QC: 0	0		Failed QC: 0	0
Duplicates: 0	0		Duplicates: 0	0
Paired-end reads: 0	0		Paired-end reads: 0	0
WT-GFPCON ookinetes3.merge.bam
Stats for BAM file(s):
Total reads: 5834001
Mapped reads: 5834001	-1
Forward strand: 3390716	-0.5812
Reverse strand: 2443285	-0.4188
Failed QC: 0	0
Duplicates: 0	0
Paired-end reads: 0	0
pclag::rab11a ookinetes3.merge.bam
Stats for BAM file(s):
Total reads: 4044348
Mapped reads: 4044348	-1
Forward strand: 2591261	-0.6407
Reverse strand: 1453087	-0.3593
Failed QC: 0	0
Duplicates: 0	0
Paired-end reads: 0	0
